# Supplementary material for: Zincothermic reduction of silica to silicon: make the impossible possible
Source: Royal Society of Chemistry journal article supplement (doi:10.1039/d1ta06073b), 2021-01-01
Supplement: d1ta06073b1.pdf [file d1ta06073b1.pdf]

**Zincothermic reduction of silica to silicon: Make the impossible possible**

Muya Cai<sup>1</sup>, Zhuqing Zhao<sup>1</sup>, Jiakang Qu<sup>1</sup>, Qiang Ma<sup>1</sup>, Xin Qu<sup>1</sup>, Lei Guo<sup>2</sup>, Hongwei Xie<sup>1</sup>, Dihua Wang<sup>2</sup>, Huayi Yin<sup>1,2</sup> \*

1. Key Laboratory for Ecological Metallurgy of Multimetallic Mineral of Ministry of Education, School of Metallurgy, Northeastern University, 11 Wenhua Road, Heping District, Shenyang 110819, P. R. China.

2. School of Resource and Environmental Science, Wuhan University, 299 Bayi Road, Wuchang District, Wuhan 430072, P. R. China.

Email: yinhuayi@whu.edu.cn

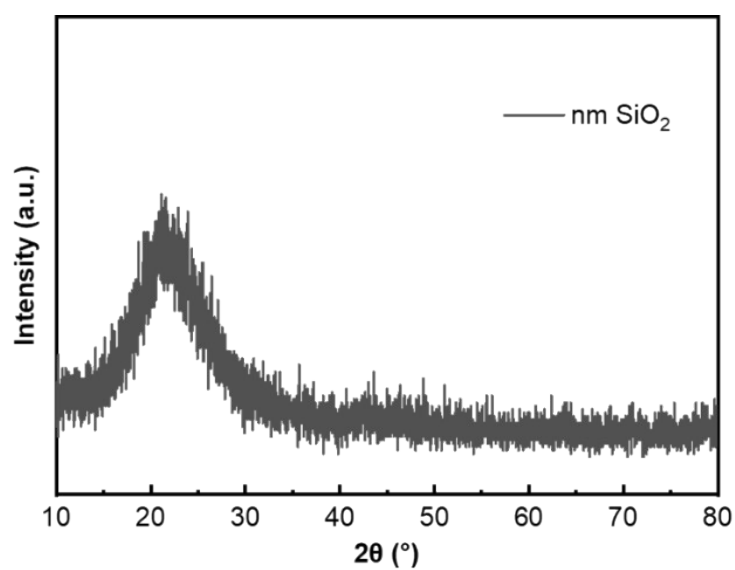

Fig. S1 The XRD pattern of nano-SiO<sub>2</sub> materials.

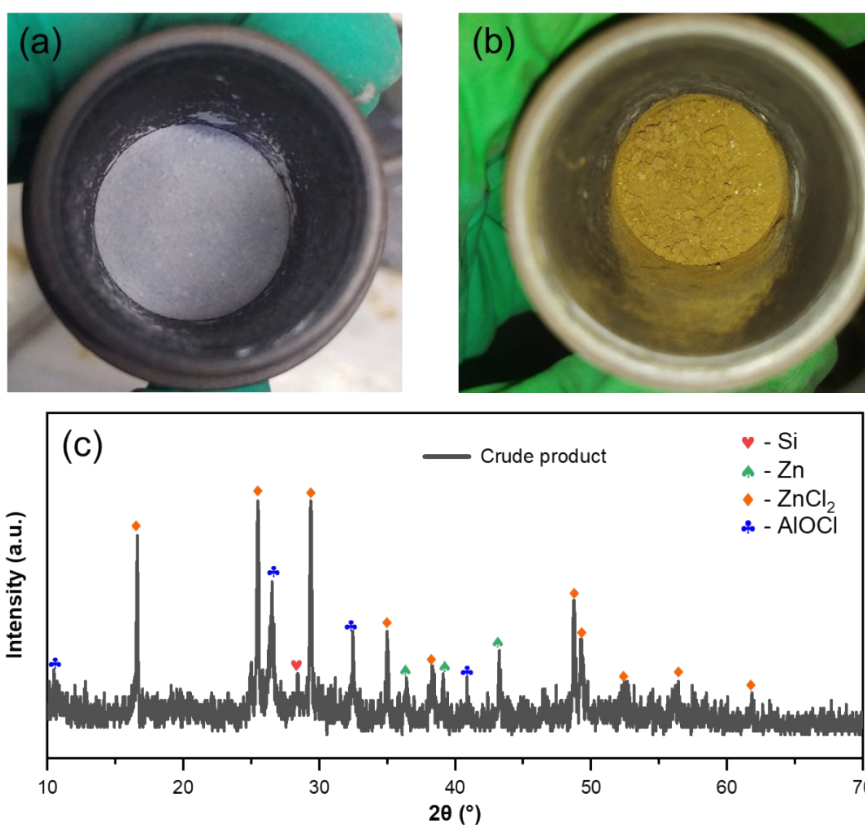

Fig. S2 Optical photograph of the (a) unreacted product including AlCl<sub>3</sub>+SiO<sub>2</sub>+Zn, (b) crude product obtained at 250 °C for 12 h without any treatment (contains salts), and (c) XRD pattern of the crude product.

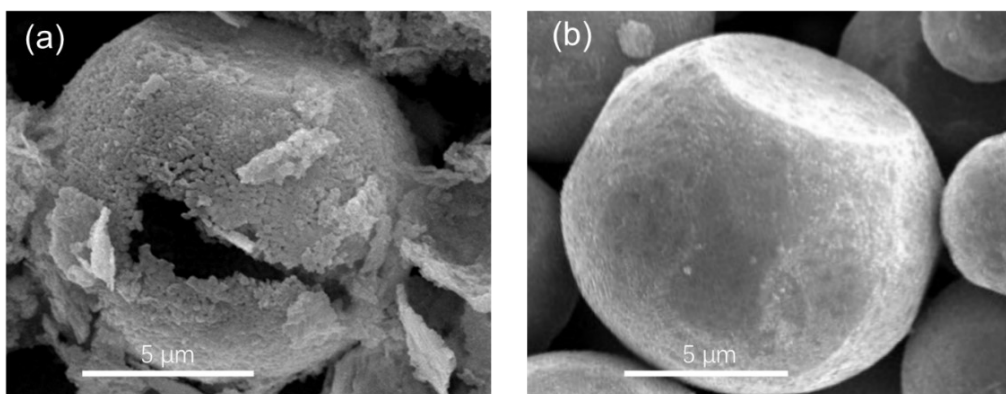

Fig. S3 SEM images of (a) hollow Si and (b) its corresponding reducing agent micro Zn particle.

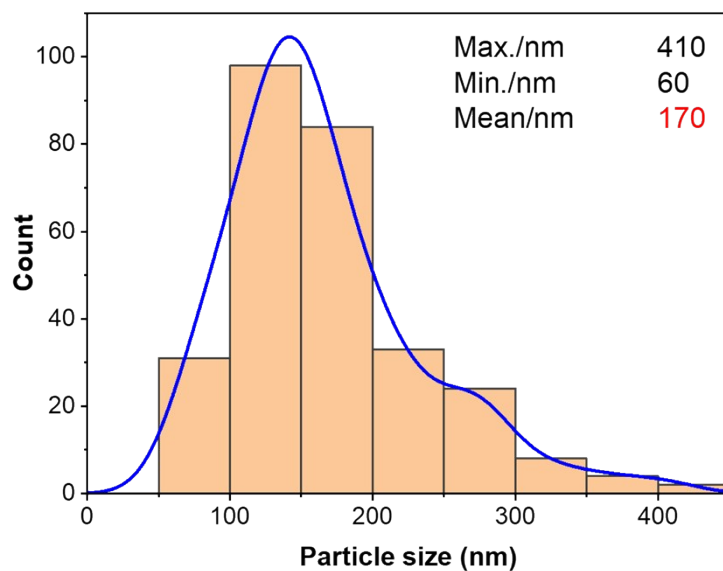

Fig. S4 Distribution profile of Si nanoparticle sizes from ZnR-Si after 10 minutes of manual grinding.

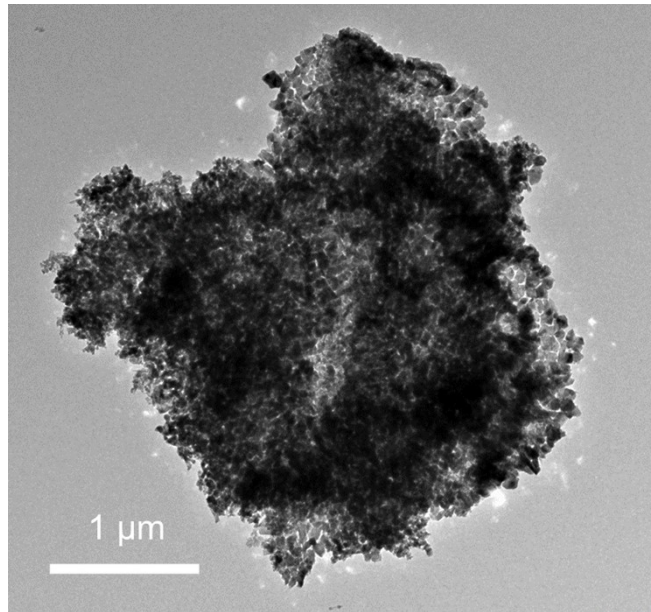

Fig. S5. TEM images of ZnR-Si with similar hollow structures and the hollow Si shell made by nano Si particles.

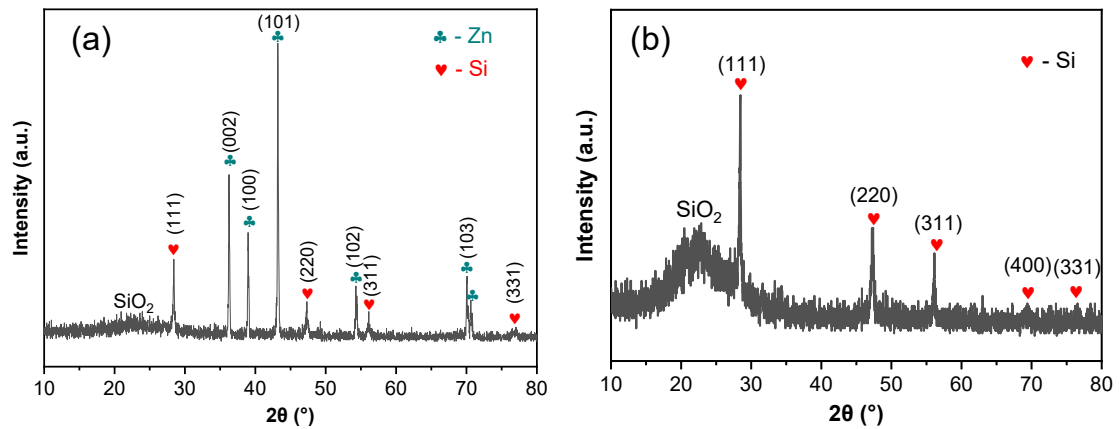

Fig. S6 XRD patterns of the zincothermic reduction sample (a) after 3 times of water washing, (b) after HCl and water washing (no HF leaching).

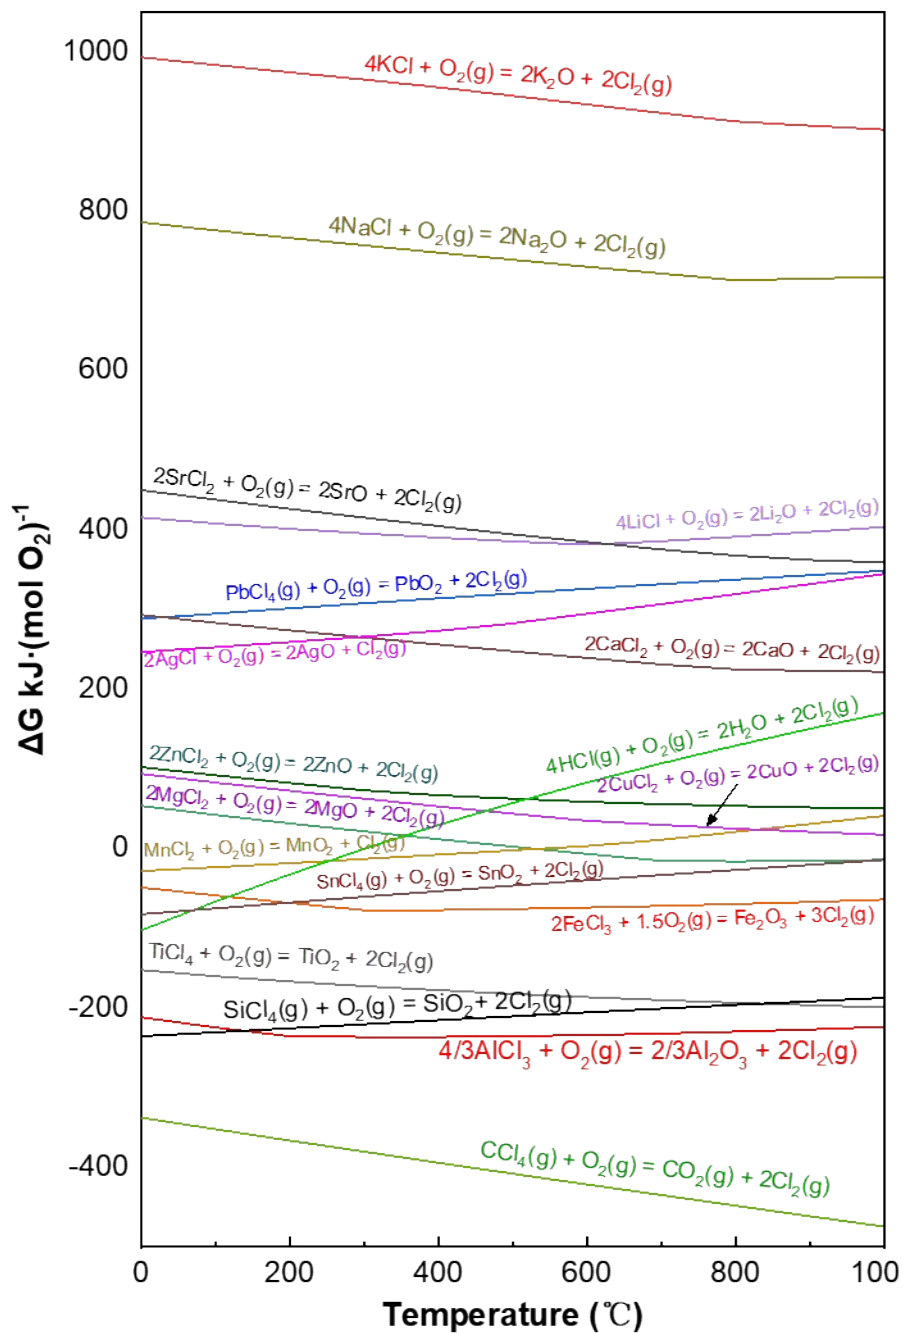

Fig. S7 Gibbs free energy profiles of the reaction of typical chlorides with oxygen as a function of temperature.

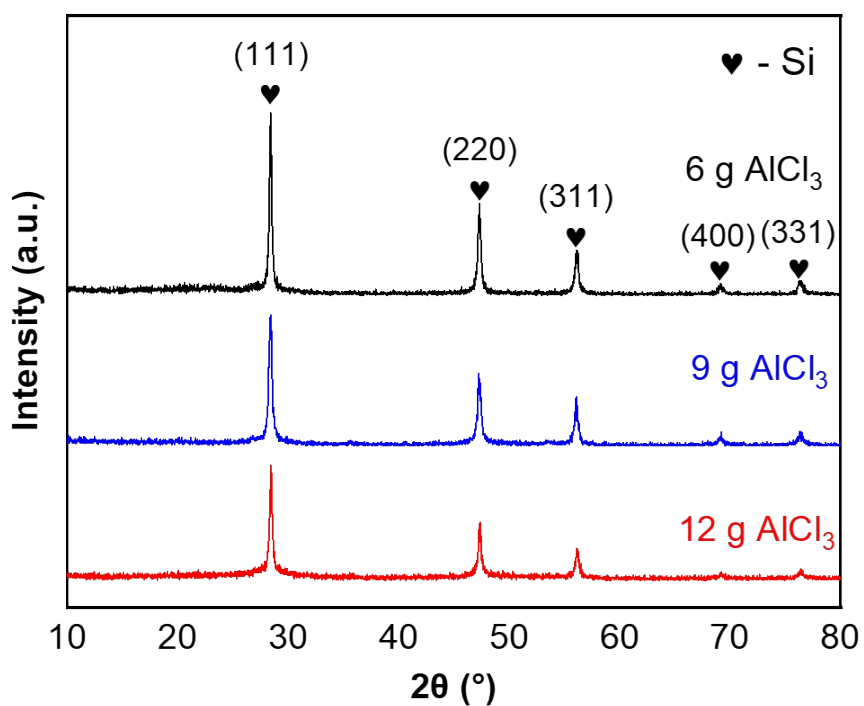

Fig. S8 XRD patterns of ZnR-Si samples with different AlCl<sub>3</sub> contents at 250 °C 12 h.

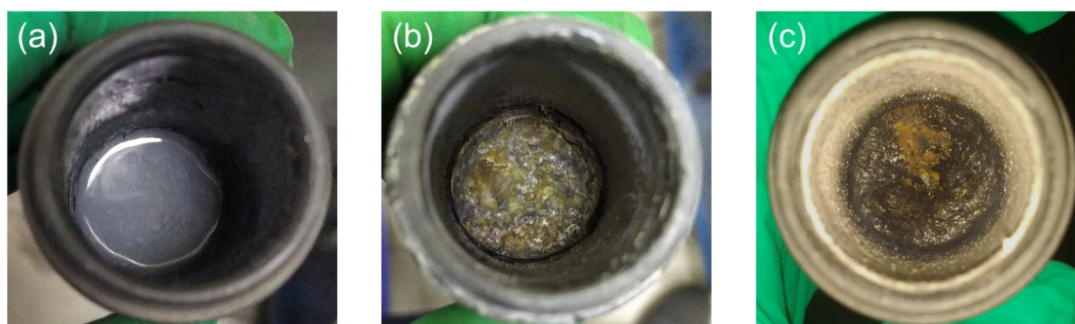

Fig. S9 Optical photographs of micro Zn powder (3 g) mixed with SiCl<sub>4</sub> solution (2.8 g) after reaction without any treatment. (a) The sample without AlCl<sub>3</sub> salt obtained at 250 °C 24 h, (b) added 2 g AlCl<sub>3</sub> obtained at 250 °C for 12 h, (c) added 5 g AlCl<sub>3</sub> obtained at 250 °C for 12 h.

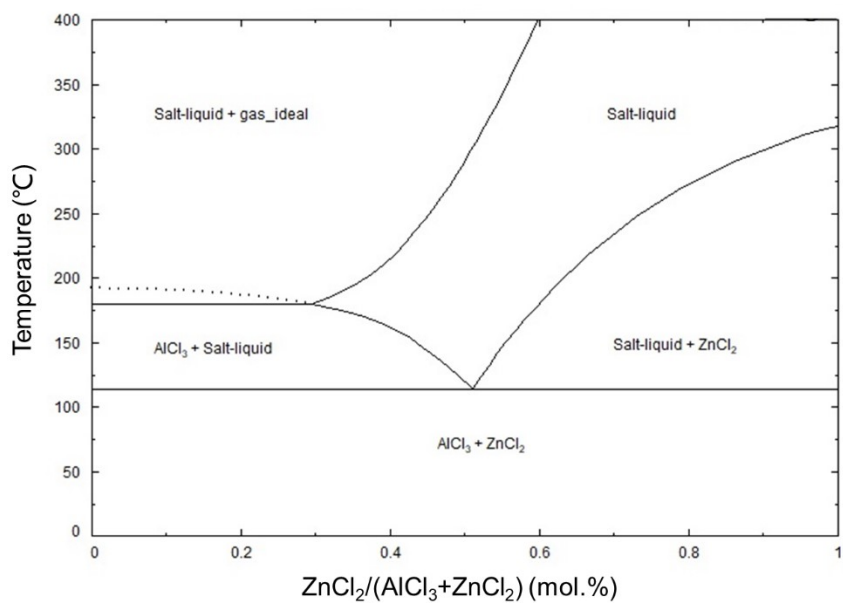

Fig. S10 Phase diagram of AlCl<sub>3</sub>-ZnCl<sub>2</sub> binary system<sup>1</sup>.

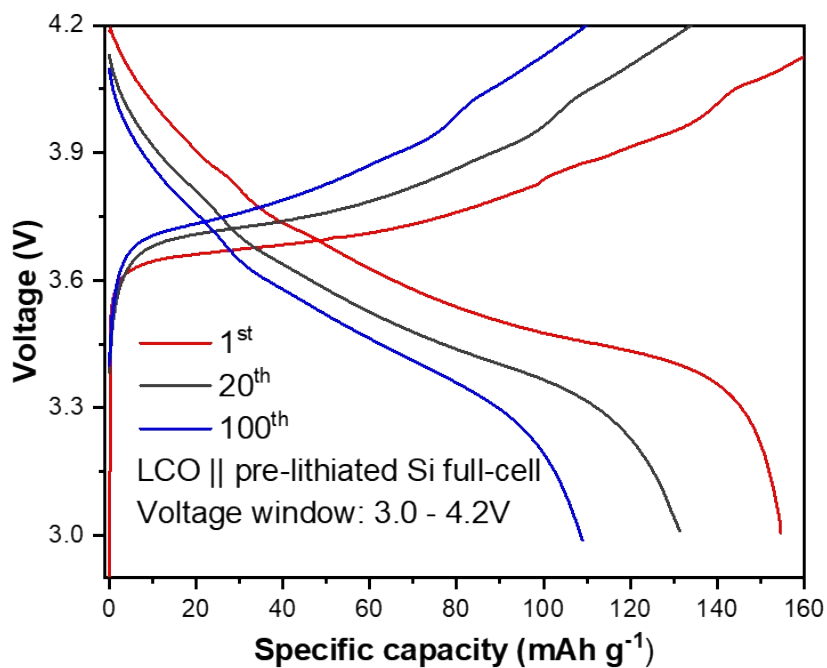

Fig. S11 Charge/discharge profiles of the LCO||Pre-lithiated Si full-cell at the 1<sup>st</sup>, 20<sup>th</sup>, and 100<sup>th</sup> cycles.

Table S1. Methods of producing silicon under various temperatures and with different reducing agents.

| Si source           | Reducing agent | Reducing Temperature (°C) | Reducing Time (h) | Synthesis conditions                            | Structure                     | Ref.         |
|---------------------|----------------|---------------------------|-------------------|-------------------------------------------------|-------------------------------|--------------|
| SiO <sub>2</sub>    | C              | 1724 ~ 1990               | n/a               | Vacuum                                          | Bulk Si                       | 2            |
| SiO <sub>2</sub>    | C              | 1500–2000                 | n/a               | n/a                                             | Bulk Si                       | 3            |
| quartz              | electron       | 850                       | 1                 | Molten CaCl <sub>2</sub><br>based salt          | Nano rods                     | 4            |
| MgSiO <sub>3</sub>  | electron       | 650                       | 12                | Molten MgCl <sub>2</sub><br>based salt          | Nano particles                | 5            |
| SiCl <sub>4</sub>   | electron       | 850                       | n/a               | Molten KF-<br>KCl                               | Bulk Si                       | 6            |
| SiO <sub>2</sub>    | Al             | 700                       | 4                 | n/a                                             | Macro porous                  | 7            |
| Rice husks          | Al             | 700                       | 3                 | n/a                                             | Porous<br>SiO <sub>x</sub> @C | 8            |
| SiO <sub>2</sub>    | Mg             | 650                       | 2.5               | n/a                                             | Micro porous                  | 9            |
| SiO <sub>2</sub>    | Mg             | 650                       | 2.5               | Solid NaCl                                      | Nano porous                   | 10           |
| SiO <sub>2</sub>    | Al or Mg       | 250                       | 12                | Molten AlCl <sub>3</sub>                        | Nano spheres                  | 11           |
| SiO <sub>2</sub> @C | Al             | 300                       | 12                | Molten AlCl <sub>3</sub> -<br>NaCl              | Nano Si@C                     | 12           |
| SiO <sub>2</sub> @C | Al             | 220                       | 16                | Molten AlCl <sub>3</sub> -<br>ZnCl <sub>2</sub> | Micro Si@C                    | 13           |
| SiCl <sub>4</sub>   | Mg             | 200                       | 10                | Molten AlCl <sub>3</sub>                        | Nano particles                | 14           |
| SiO <sub>2</sub>    | Zn             | 250                       | 12                | Molten AlCl <sub>3</sub>                        | Hollow<br>spheres             | This<br>work |



## References

1. S. Pedersen, *Viscosity, structure and glass formation in the AlCl<sub>3</sub>-ZnCl<sub>2</sub> system*, Fakultet for naturvitenskap og teknologi, 2001.
2. P. G. Loutzenhiser, O. Tuerk and A. Steinfeld, *Jom*, 2010, **62**, 49-54.
3. H.-C. Lee, S. Dhage, M. S. Akhtar, D. H. Kwak, W. J. Lee, C.-Y. Kim and O. B. Yang, *Curr. Appl. Phys.*, 2010, **10**, S218-S221.
4. T. Nohira, K. Yasuda and Y. Ito, *Nat. Mater.*, 2003, **2**, 397-401.
5. M. Cai, X. Zhou, Z. Zhao, Q. Ma, H. Xie, X. Li and H. Yin, *ACS Sustain. Chem. Eng.*, 2020, **8**, 9866-9874.
6. K. Yasuda, K. Maeda, R. Hagiwara, T. Homma and T. Nohira, *J. Electrochem. Soc.*, 2016, **164**, D67-D71.
7. N.-K. Park, Y. H. Jeong, T. J. Lee, S. H. Lee and S. H. Lee, *J. Nanosci. Nanotechnol.*, 2018, **18**, 7275-7280.
8. J. Cui, Y. Cui, S. Li, H. Sun, Z. Wen and J. Sun, *ACS Appl. Mater. Interfaces*, 2016, **8**, 30239-30247.
9. Z. Bao, M. R. Weatherspoon, S. Shian, Y. Cai, P. D. Graham, S. M. Allan, G. Ahmad, M. B. Dickerson, B. C. Church, Z. Kang, H. W. Abernathy, 3rd, C. J. Summers, M. Liu and K. H. Sandhage, *Nature*, 2007, **446**, 172-175.
10. W. Luo, X. Wang, C. Meyers, N. Wannemacher, W. Sirisaksoontorn, M. M. Lerner and X. Ji, *Sci. Rep.*, 2013, **3**, 2222.
11. N. Lin, Y. Han, J. Zhou, K. Zhang, T. Xu, Y. Zhu and Y. Qian, *Energy Environ. Sci.*, 2015, **8**, 3187-3191.
12. P. Gao, X. Huang, Y. Zhao, X. Hu, D. Cen, G. Gao, Z. Bao, Y. Mei, Z. Di and G. Wu, *ACS Nano*, 2018, **12**, 11481-11490.
13. K. Mishra, J. Zheng, R. Patel, L. Estevez, H. Jia, L. Luo, P. Z. El-Khoury, X. Li, X.-D. Zhou and J.-G. Zhang, *Electrochim. Acta*, 2018, **269**, 509-516.
14. N. Lin, Y. Han, L. Wang, J. Zhou, J. Zhou, Y. Zhu and Y. Qian, *Angew. Chem. Int. Ed. Engl.*, 2015, **54**, 3822-3825.
